# Supplementary material
Source: PubMed Central journal article supplement (PMC6543699)
Supplement: plantbiotechnology-34-1-17.0113a-s001.pdf [file plantbiotechnology-34-1-17.0113a-s001.pdf]

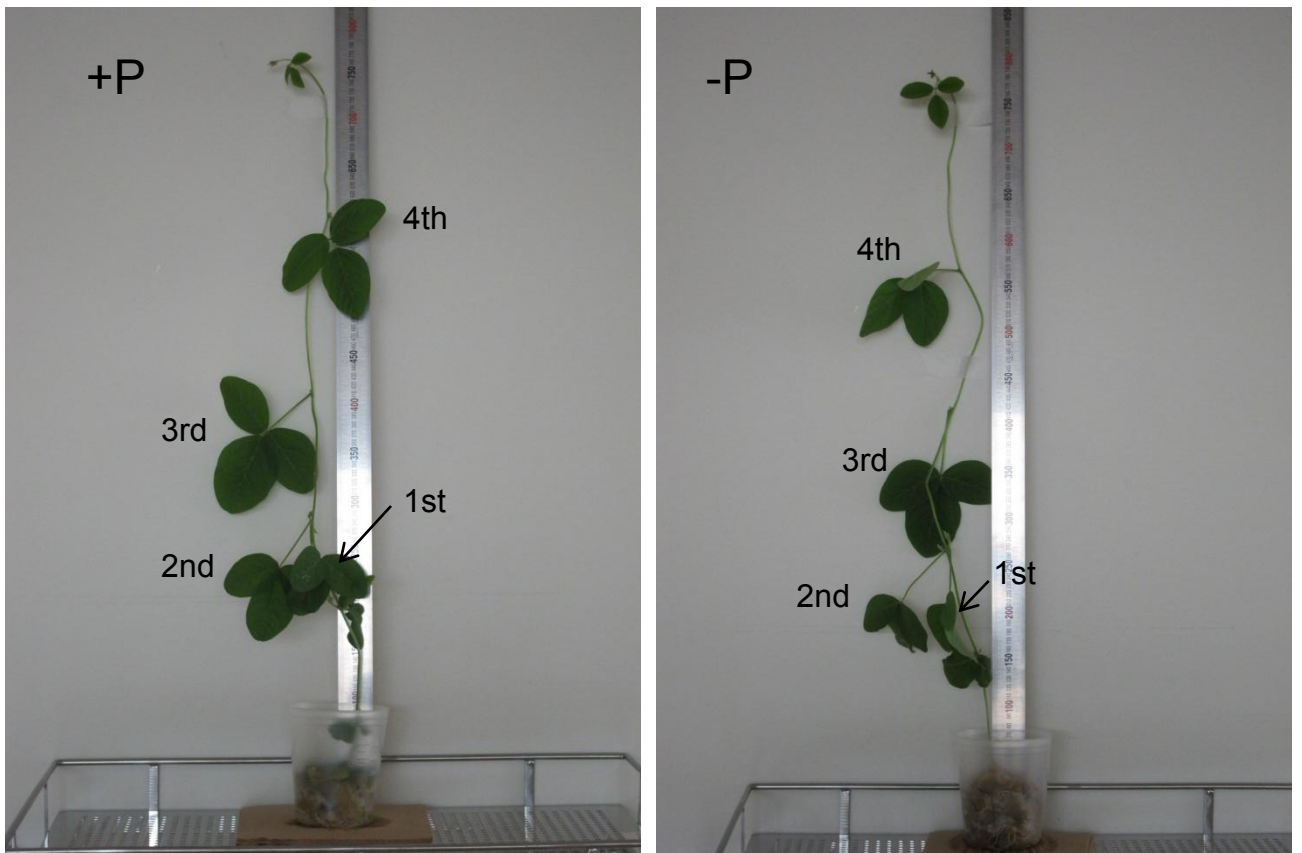

**Supplementary Figure 1. Soybean plants grown under P-controlled conditions.**

The seeds of soybean were incubated in wet potting mix for 10 days, and transplanted in rockwool to which MGRL hydroponic medium ([Fujiwara et al. 1992](#)) was supplied. After a 2-week incubation on rockwool, a central leaflet of each trifoliate leaf was harvested and subjected to LC-MS.

(A)

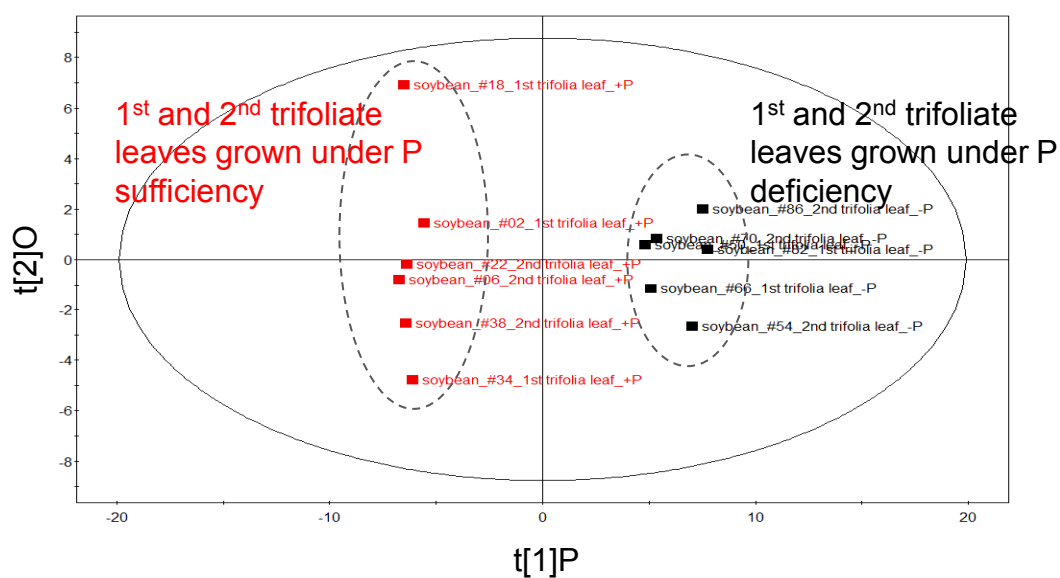

(B)

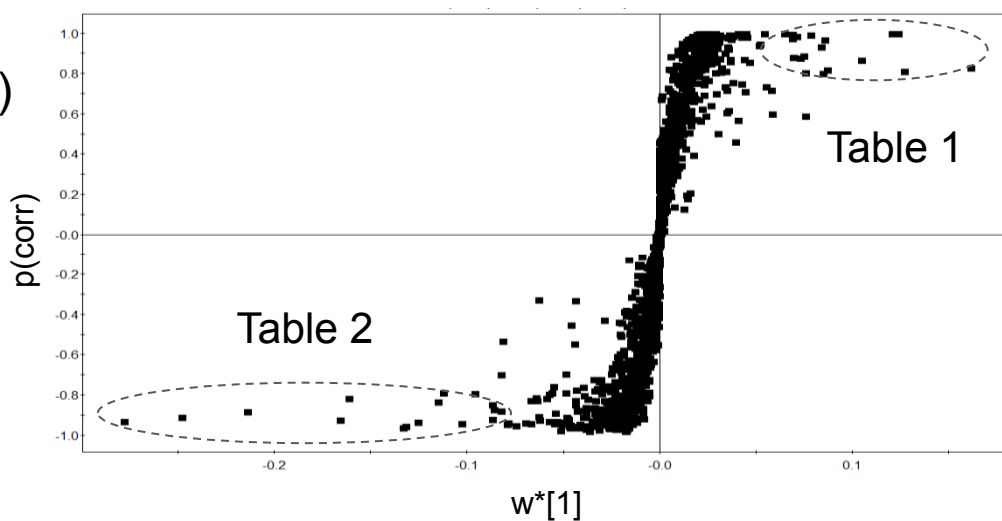

**Supplemental Figure 2. OPLS-DA of lipidome data from 1<sup>st</sup> and 2<sup>nd</sup> trifoliolate leaves of soybean.**

- (A) Score plot ( $R^2X[1] = 0.5981$ ,  $R^2X[2] = 0.1476$ ). The 2 groups of samples with different P availability are clearly separated.
- (B) S-plot. The variables that changed most and strongly contributed to the class separation are circled. Details of variables circled in the upper right and lower left are shown in Tables 1 and 2.

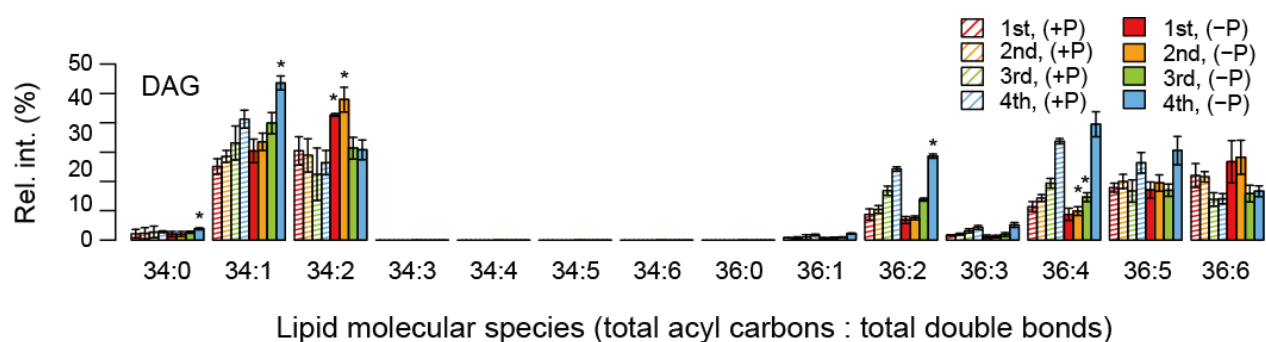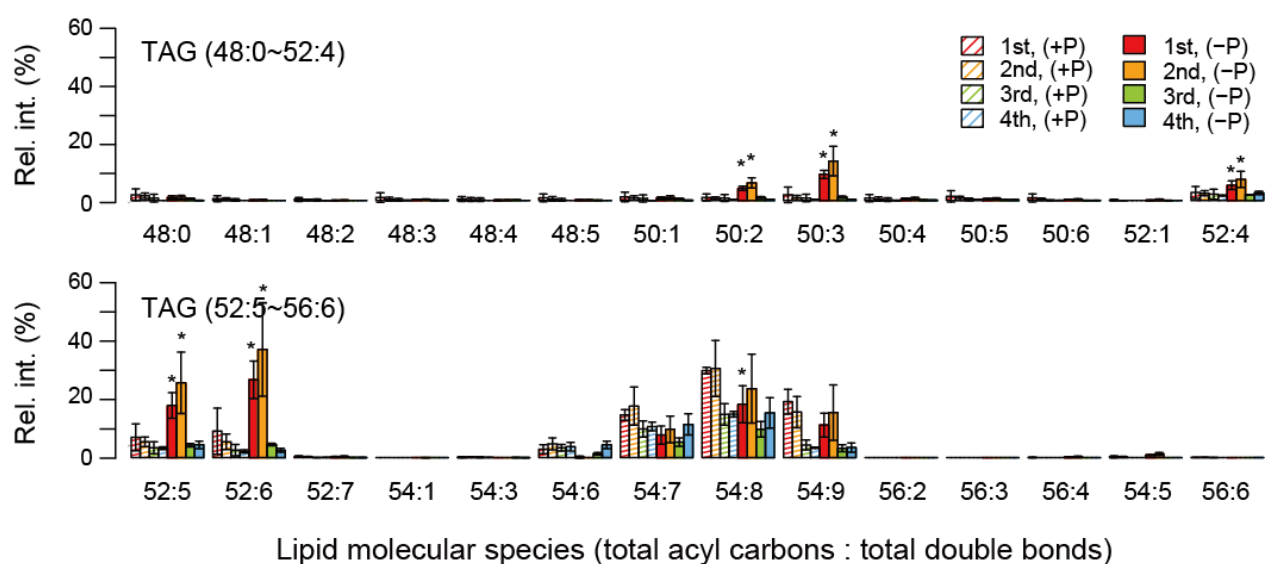

**Supplemental Figure 3. Profiles of DAG and TAG in each trifoliolate leaf of soybean grown under P-sufficient or P-deficient growth conditions.**

Intensity of each lipid signal was normalized based on that of the internal standard. Then, the normalized peak intensity of each lipid class of 1st trifoliolate leaf grown under P-sufficient growth conditions were summed, and the mean value of 3 biological replicates were calculated. Using this value (= 100% of y axis), relative intensity (Rel. int.) of each lipid signals in a particular lipid class was calculated and shown in this figure. Statistical significance in the changes in the levels of individual lipids upon P deficiency were examined by Welch's t-test.
